# Supplementary material for: CLIMADAT-GRid: a high-resolution daily gridded precipitation and temperature dataset for Greece
Source: Copernicus journal article supplement (doi:10.5194/essd-17-4455-2025), 2025-09-10
Supplement: Supplementary file 1 [file essd-17-4455-2025-supplement.pdf]

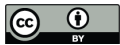

*Supplement of*

## **CLIMADAT-GRid: a high-resolution daily gridded precipitation and temperature dataset for Greece**

**Konstantinos V. Varotsos et al.**

*Correspondence to:* Konstantinos V. Varotsos ([varotsos@noa.gr](mailto:varotsos@noa.gr))

The copyright of individual parts of the supplement might differ from the article licence.

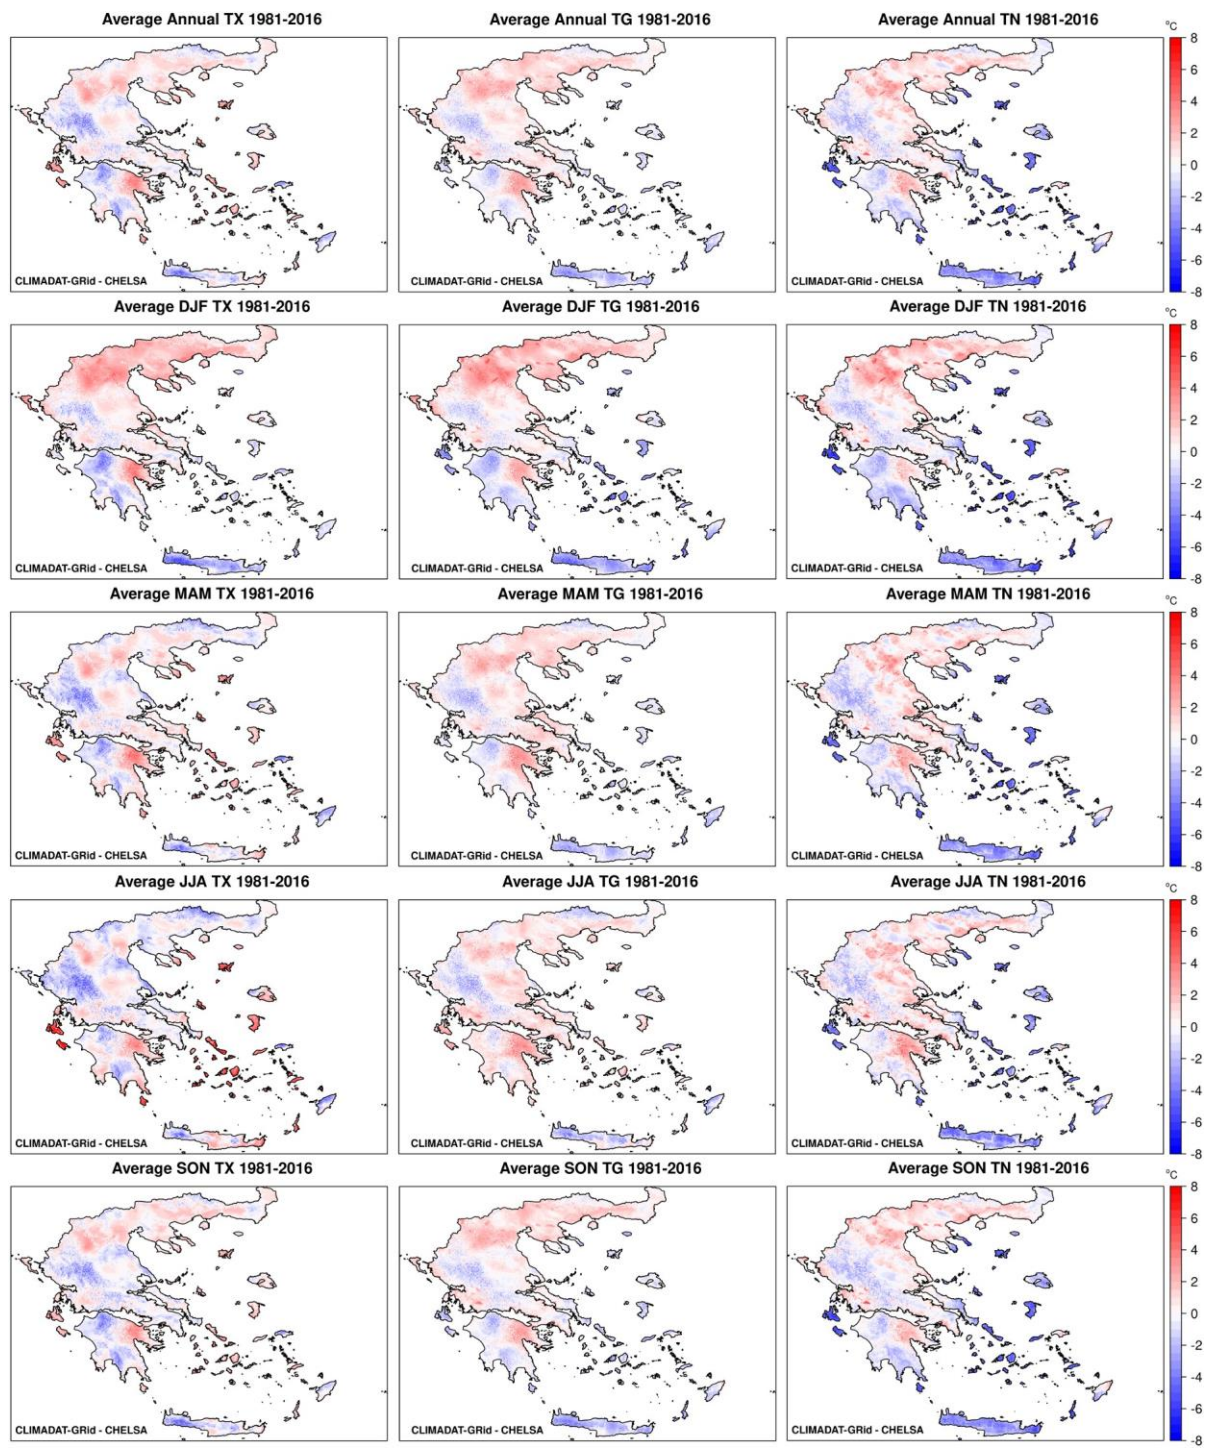

**Figure S1. Average annual and seasonal differences for *TX*, *TG* and *TN* between CLIMADAT-Grid and CHLSA for the period 1981–2016.**

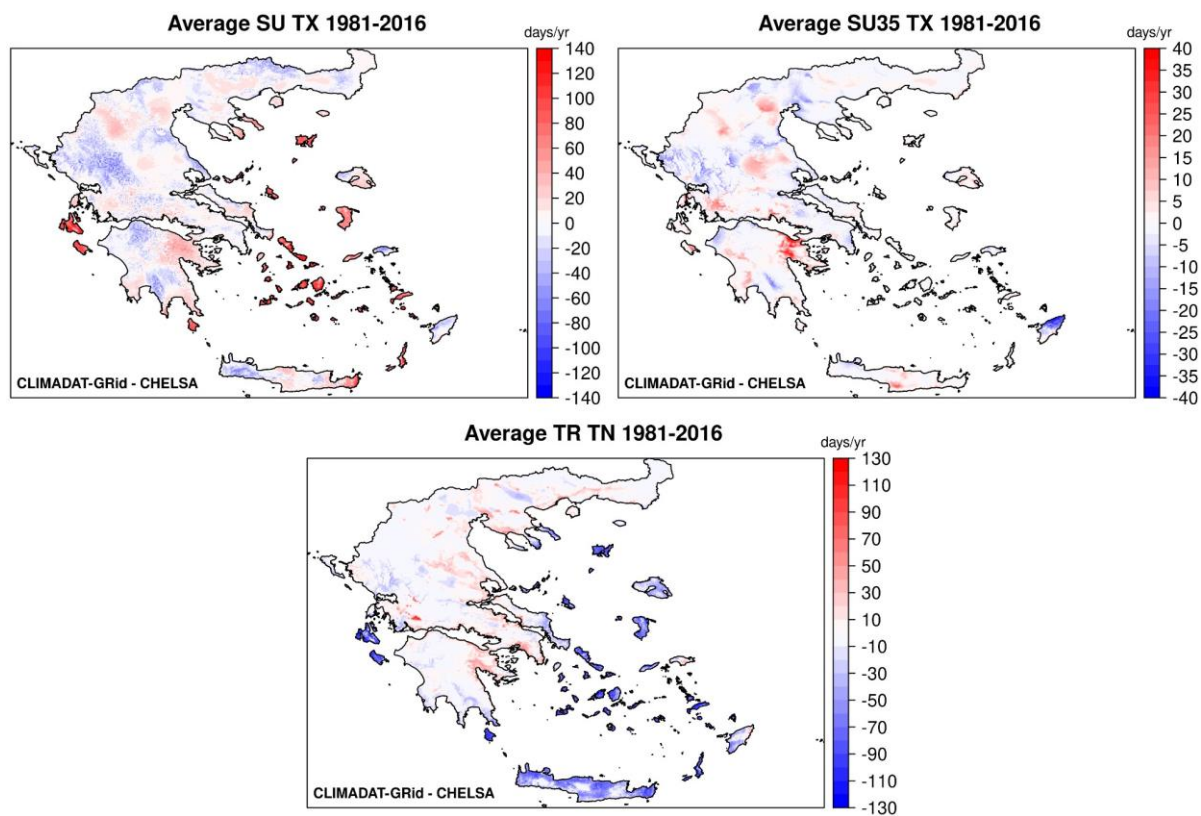

**Figure S2. Average annual differences for SU, SU35 and TR between CLIMADAT-GRId and CHELSA for the period 1981–2016.**

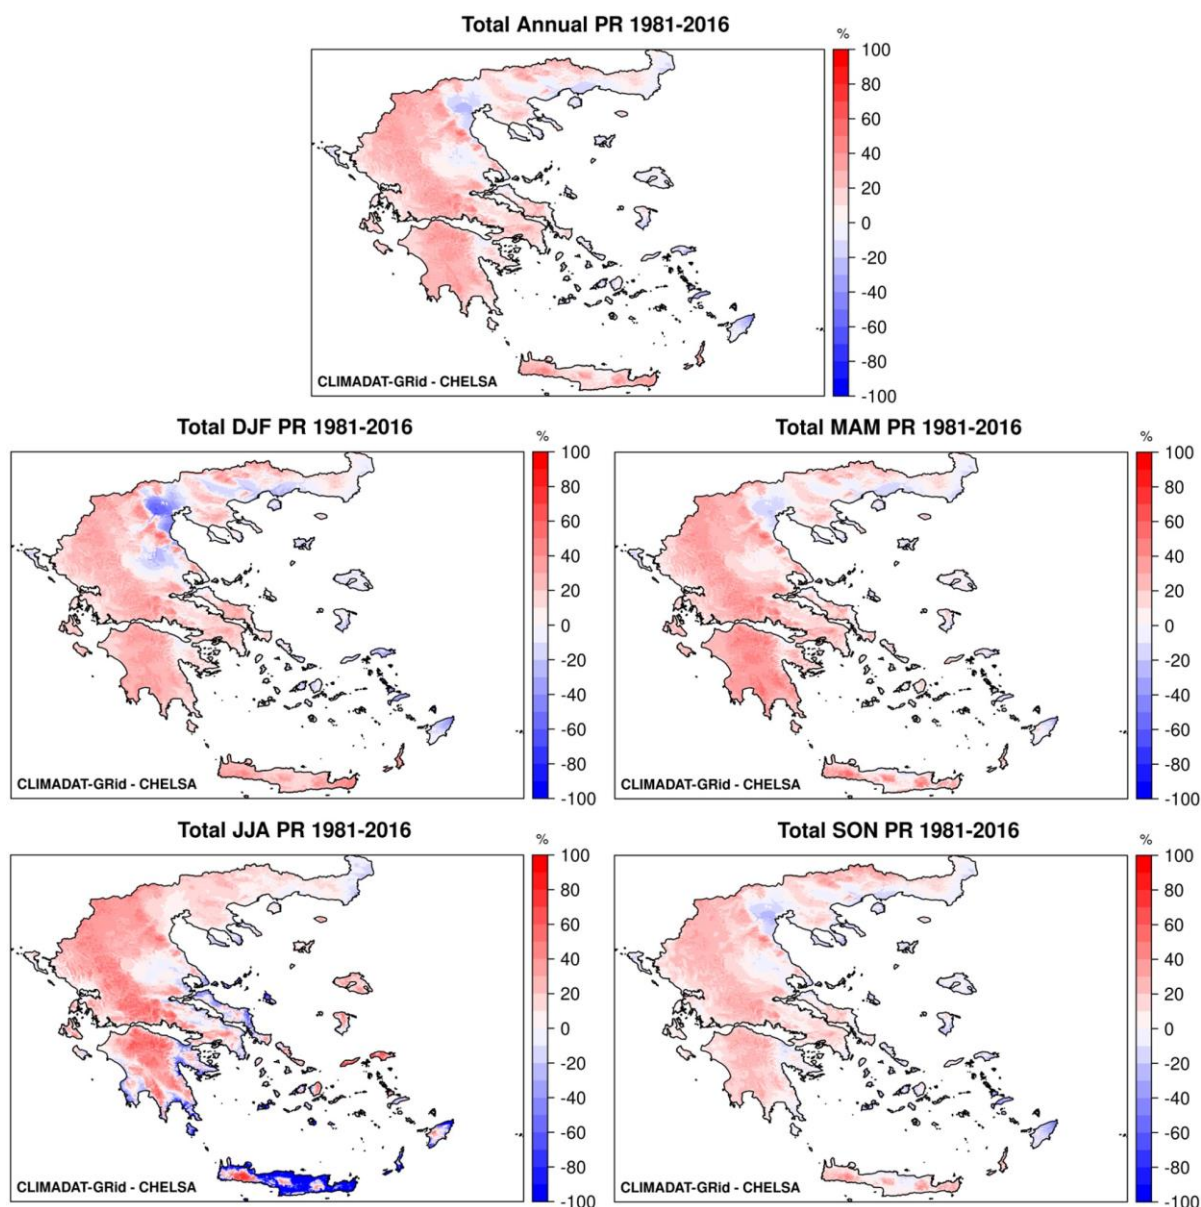

**Figure S3.** Average annual and seasonal relative differences in precipitation between CLIMADAT-GRid and CHELSA for the period 1981–2016.

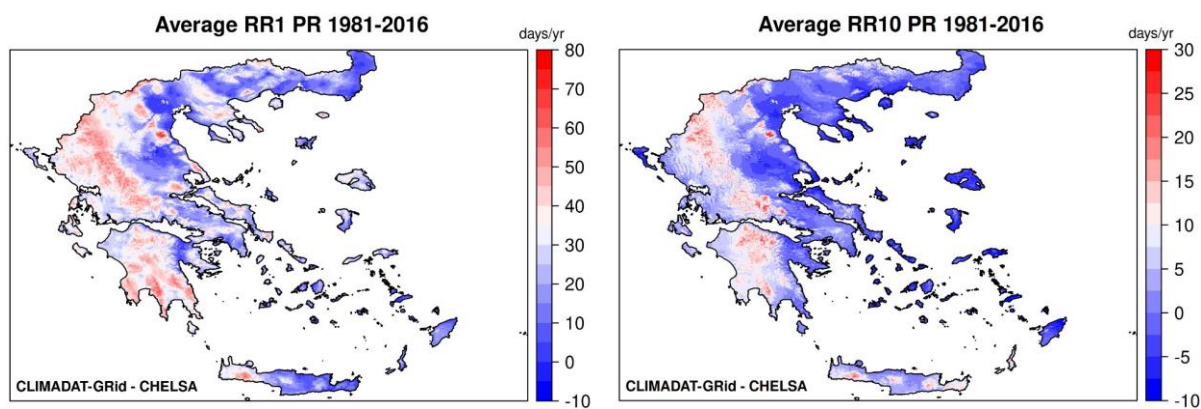

**Figure S4.** Average annual differences for RR1 and RR10 between CLIMADAT-GRid and CHELSA for the period 1981–2016.
